# Supplementary material for: Development of the Korean Developmental Screening Test for Infants and Children (K-DST)
Source: PubMed Central journal article supplement — Clin Exp Pediatr. 2020 May 14;63(11):438–46. doi: 10.3345/cep.2020.00640 (PMC7642140; doi:10.3345/cep.2020.00640), 2020-05-14
Supplement: cep-2020-00640-suppl1.pdf [file cep-2020-00640-suppl1.pdf]

**Supplementary Table 1. Distribution of sample groups by age, region, regional size, and sex**

|                            | 0 Year | 1 Year | 2 Years | 3 Years | 4 Years | 5 Years | 6 Years | Total |
|----------------------------|--------|--------|---------|---------|---------|---------|---------|-------|
| Seoul                      | 94     | 138    | 96      | 83      | 93      | 82      | 86      | 672   |
| Capital area               | 164    | 252    | 167     | 123     | 108     | 106     | 102     | 1,022 |
| Kangwon-do, Chungcheong-do | 66     | 100    | 70      | 52      | 54      | 45      | 32      | 419   |
| Jeolla-do, Jeju-do         | 57     | 85     | 60      | 46      | 35      | 30      | 27      | 340   |
| Gyeongsang-do              | 124    | 191    | 153     | 94      | 101     | 88      | 78      | 829   |
| Total                      | 505    | 766    | 546     | 398     | 391     | 351     | 325     | 3,282 |

|                         | Dong |        | Eup  |        | Myeon |        | Total |
|-------------------------|------|--------|------|--------|-------|--------|-------|
|                         | Male | Female | Male | Female | Male  | Female |       |
| Seoul                   | 322  | 350    | -    | -      | -     | -      | 672   |
| Capital area            | 105  | 112    | 290  | 331    | 84    | 100    | 1,022 |
| Kangwon, Chungcheong-do | 62   | 72     | 86   | 98     | 54    | 47     | 419   |
| Jeolla-do, Jeju-do      | 42   | 54     | 109  | 77     | 24    | 34     | 340   |
| Gyeongsang-do           | 205  | 185    | 175  | 167    | 44    | 53     | 829   |
| Total                   | 736  | 773    | 660  | 673    | 206   | 234    | 3,282 |

Two missing values in the region (The total number of valid samples is 3,284).
