# Supplementary material for: Development of the Korean Developmental Screening Test for Infants and Children (K-DST)
Source: PubMed Central journal article supplement — Clin Exp Pediatr. 2020 May 14;63(11):438–46. doi: 10.3345/cep.2020.00640 (PMC7642140; doi:10.3345/cep.2020.00640), 2020-05-14
Supplement: cep-2020-00640-suppl2.pdf [file cep-2020-00640-suppl2.pdf]

**Supplementary Table 2. Distribution by age group of sample groups**

| Age group (mo) | Number (%) | Age group (mo) | Number (%) |
|----------------|------------|----------------|------------|
| 4-5            | 121 (3.7)  | 27-29          | 142 (4.3)  |
| 6-7            | 121 (3.7)  | 30-32          | 137 (4.2)  |
| 8-9            | 120 (3.7)  | 33-35          | 131 (4.0)  |
| 10-11          | 143 (4.4)  | 36-41          | 195 (5.9)  |
| 12-13          | 145 (4.4)  | 42-47          | 203 (6.2)  |
| 14-15          | 127 (3.9)  | 48-53          | 181 (5.5)  |
| 16-17          | 122 (3.7)  | 54-59          | 211 (6.4)  |
| 18-19          | 123 (3.7)  | 60-65          | 168 (5.1)  |
| 20-21          | 120 (3.7)  | 66-71          | 183 (5.6)  |
| 22-23          | 129 (3.9)  | 72-77          | 183 (5.6)  |
| 24-26          | 136 (4.1)  | 78-83          | 143 (4.4)  |
