# Supplementary material for: Development of the Korean Developmental Screening Test for Infants and Children (K-DST)
Source: PubMed Central journal article supplement — Clin Exp Pediatr. 2020 May 14;63(11):438–46. doi: 10.3345/cep.2020.00640 (PMC7642140; doi:10.3345/cep.2020.00640), 2020-05-14
Supplement: cep-2020-00640-suppl3.pdf [file cep-2020-00640-suppl3.pdf]

**Supplementary Table 3. Average and standard deviation of total score by subarea according to age group**

| Age group (mo) | Mean               |            |           |          |               |           |
|----------------|--------------------|------------|-----------|----------|---------------|-----------|
|                | Gross motor        | Fine motor | Cognition | Language | Social skills | Self-help |
| 4-5            | 18.80              | 20.13      | 19.60     | 18.99    | 18.97         |           |
| 6-7            | 19.05              | 21.16      | 20.72     | 20.52    | 19.75         | -         |
| 8-9            | 18.80              | 20.92      | 20.35     | 18.36    | 19.66         | -         |
| 10-11          | 21.15              | 21.91      | 21.84     | 19.97    | 20.40         | -         |
| 12-13          | 21.30              | 21.12      | 21.32     | 20.12    | 20.61         | -         |
| 14-15          | 21.90              | 21.35      | 20.57     | 19.93    | 21.00         | -         |
| 16-17          | 21.57              | 20.86      | 20.02     | 20.05    | 20.34         | -         |
| 18-19          | 21.12              | 20.62      | 19.25     | 17.68    | 19.61         | 19.39     |
| 20-21          | 20.33              | 20.43      | 18.86     | 16.64    | 18.82         | 19.01     |
| 22-23          | 20.41              | 20.08      | 19.08     | 18.69    | 18.94         | 19.11     |
| 24-26          | 20.57              | 19.43      | 19.90     | 20.23    | 18.92         | 19.60     |
| 27-29          | 20.40              | 19.16      | 19.89     | 20.06    | 19.68         | 18.13     |
| 30-32          | 20.81              | 19.12      | 18.79     | 21.48    | 19.08         | 19.39     |
| 33-35          | 20.18              | 18.94      | 20.22     | 21.79    | 19.85         | 19.85     |
| 36-41          | 18.89              | 18.89      | 19.73     | 21.20    | 19.44         | 19.44     |
| 42-47          | 20.04              | 20.34      | 20.44     | 20.54    | 18.90         | 18.90     |
| 48-53          | 20.52              | 20.68      | 19.72     | 20.75    | 18.80         | 18.80     |
| 54-59          | 20.16              | 21.66      | 19.64     | 19.58    | 18.08         | 18.08     |
| 60-65          | 20.73              | 22.19      | 19.80     | 20.27    | 18.24         | 18.24     |
| 66-71          | 21.60              | 21.69      | 19.98     | 20.37    | 19.25         | 19.25     |
| Age group (mo) | Standard deviation |            |           |          |               |           |
|                | Gross motor        | Fine motor | Cognition | Language | Social skills | Self-help |
| 4-5            | 3.78               | 3.51       | 3.28      | 3.50     | 3.55          | -         |
| 6-7            | 4.02               | 2.94       | 2.88      | 3.05     | 3.24          | -         |
| 8-9            | 5.32               | 2.80       | 3.13      | 4.04     | 3.26          | -         |
| 10-11          | 2.75               | 2.58       | 2.47      | 3.80     | 3.23          | -         |
| 12-13          | 4.30               | 3.35       | 2.42      | 3.56     | 3.55          | -         |
| 14-15          | 3.16               | 2.71       | 2.89      | 4.09     | 2.85          | -         |
| 16-17          | 3.60               | 3.53       | 4.03      | 4.08     | 3.86          | -         |
| 18-19          | 3.23               | 3.70       | 5.06      | 5.27     | 4.94          | 3.97      |
| 20-21          | 3.57               | 3.43       | 4.04      | 5.96     | 4.28          | 3.87      |
| 22-23          | 4.13               | 4.12       | 4.29      | 5.46     | 4.87          | 4.62      |
| 24-26          | 3.50               | 3.38       | 4.00      | 4.79     | 5.07          | 3.86      |
| 27-29          | 3.56               | 3.25       | 3.72      | 4.61     | 4.66          | 4.79      |
| 30-32          | 3.25               | 3.70       | 4.74      | 3.54     | 4.49          | 4.01      |
| 33-35          | 3.44               | 3.79       | 3.73      | 3.48     | 3.77          | 3.54      |
| 36-41          | 3.47               | 4.01       | 3.89      | 4.15     | 4.19          | 4.19      |
| 42-47          | 3.15               | 3.72       | 3.65      | 3.82     | 4.15          | 3.78      |
| 48-53          | 3.02               | 3.85       | 3.54      | 3.88     | 4.43          | 3.53      |
| 54-59          | 3.23               | 3.14       | 3.49      | 3.84     | 3.81          | 3.21      |
| 60-65          | 3.38               | 3.09       | 3.72      | 3.71     | 3.87          | 3.24      |
| 66-71          | 2.89               | 2.70       | 4.72      | 3.73     | 4.03          | 3.71      |
