# Supplementary material for: Development of the Korean Developmental Screening Test for Infants and Children (K-DST)
Source: PubMed Central journal article supplement — Clin Exp Pediatr. 2020 May 14;63(11):438–46. doi: 10.3345/cep.2020.00640 (PMC7642140; doi:10.3345/cep.2020.00640), 2020-05-14
Supplement: cep-2020-00640-suppl4.pdf [file cep-2020-00640-suppl4.pdf]

**Supplementary Table 4. Discrimination and difficulty of each item**

| Item | Gross motor    |            | Fine motor     |            | Cognition      |            | Language       |            | Social skills  |            | Self-help      |            |
|------|----------------|------------|----------------|------------|----------------|------------|----------------|------------|----------------|------------|----------------|------------|
|      | Discrimination | Difficulty |
| 1    | 4.87           | -2.94      | 3.65           | -3.35      | 10.42          | -1.33      | 3.58           | -2.96      | 4.17           | -2.83      | 3.40           | -3.00      |
| 2    | 3.87           | -3.17      | 3.08           | -3.37      | 8.84           | -1.82      | 3.82           | -3.03      | 1.11           | -3.88      | 3.37           | -3.14      |
| 3    | 4.34           | -2.93      | 2.98           | -3.29      | 3.15           | -3.42      | 3.74           | -3.21      | 2.35           | -3.91      | 3.08           | -2.92      |
| 4    | 4.56           | -2.67      | 2.70           | -3.81      | 3.31           | -2.84      | 4.30           | -2.95      | 3.52           | -2.95      | 4.42           | -2.49      |
| 5    | 6.07           | -2.41      | 3.34           | -3.29      | 3.07           | -3.08      | 4.02           | -2.42      | 4.24           | -2.73      | 3.98           | -2.64      |
| 6    | 6.83           | -2.40      | 4.39           | -2.74      | 3.38           | -3.05      | 3.51           | -2.40      | 3.37           | -2.82      | 3.78           | -2.27      |
| 7    | 4.83           | -2.39      | 3.79           | -2.72      | 3.30           | -2.43      | 3.80           | -2.47      | 6.93           | -2.35      | 3.26           | -2.07      |
| 8    | 6.90           | -2.14      | 3.68           | -2.76      | 3.36           | -2.66      | 3.26           | -2.50      | 2.45           | -2.32      | 4.05           | -2.10      |
| 9    | 6.63           | -2.11      | 4.15           | -2.55      | 3.56           | -2.33      | 4.75           | -2.16      | 7.73           | -1.74      | 2.87           | -2.12      |
| 10   | 11.33          | -1.81      | 14.89          | -1.81      | 6.38           | -1.88      | 6.52           | -1.58      | 10.54          | -1.64      | 5.17           | -1.42      |
| 11   | 9.53           | -1.64      | 12.10          | -1.72      | 5.18           | -1.79      | 9.97           | -1.39      | 8.54           | -1.50      | 5.11           | -1.54      |
| 12   | 10.03          | -1.66      | 10.36          | -1.67      | 13.73          | -1.53      | 6.70           | -1.32      | 9.86           | -1.47      | 13.29          | -1.21      |
| 13   | 17.49          | -1.50      | 11.09          | -1.48      | 9.95           | -1.49      | 10.51          | -1.28      | 11.78          | -1.25      | 10.73          | -1.16      |
| 14   | 15.20          | -1.44      | 7.85           | -1.45      | 15.04          | -1.53      | 9.22           | -1.33      | 11.13          | -1.19      | 9.99           | -1.07      |
| 15   | 18.97          | -1.38      | 6.69           | -1.45      | 11.94          | -1.27      | 9.29           | -1.17      | 10.91          | -1.20      | 7.93           | -0.95      |
| 16   | 11.79          | -1.33      | 13.77          | -1.26      | 11.83          | -1.25      | 10.85          | -0.99      | 10.08          | -1.03      | 6.19           | -0.85      |
| 17   | 13.29          | -1.23      | 15.28          | -1.25      | 6.07           | -0.89      | 9.95           | -0.99      | 10.31          | -0.99      | 11.55          | -0.70      |
| 18   | 11.89          | -1.18      | 13.95          | -1.17      | 7.24           | -0.76      | 11.99          | -1.01      | 10.66          | -1.00      | 11.40          | -0.63      |
| 19   | 18.71          | -1.08      | 10.80          | -0.98      | 11.64          | -0.80      | 14.14          | -0.85      | 13.22          | -0.79      | 11.14          | -0.60      |
| 20   | 20.98          | -1.01      | 9.55           | -0.95      | 16.82          | -0.67      | 15.67          | -0.79      | 12.58          | -0.78      | 11.50          | -0.70      |
| 21   | 17.92          | -0.94      | 13.17          | -0.76      | 14.98          | -0.61      | 15.79          | -0.73      | 14.20          | -0.83      | 8.03           | -0.56      |
| 22   | 12.20          | -0.81      | 14.77          | -0.81      | 16.37          | -0.69      | 13.63          | -0.60      | 10.10          | -0.61      | 7.33           | -0.38      |
| 23   | 11.64          | -0.78      | 13.95          | -0.80      | 13.81          | -0.61      | 9.72           | -0.53      | 8.53           | -0.48      | 9.52           | -0.46      |
| 24   | 11.42          | -0.81      | 10.97          | -0.59      | 9.43           | -0.46      | 11.11          | -0.48      | 11.33          | -0.60      | 8.62           | -0.44      |
| 25   | 17.64          | -0.60      | 10.45          | -0.58      | 11.45          | -0.47      | 9.83           | -0.46      | 10.33          | -0.50      | 12.44          | -0.25      |
| 26   | 20.17          | -0.59      | 12.90          | -0.48      | 9.46           | -0.35      | 11.45          | -0.46      | 11.70          | -0.51      | 11.00          | -0.24      |
| 27   | 18.39          | -0.57      | 11.87          | -0.49      | 7.63           | -0.26      | 12.23          | -0.25      | 8.88           | -0.49      | 10.46          | -0.18      |
| 28   | 12.73          | -0.47      | 13.11          | -0.42      | 11.13          | -0.24      | 10.43          | -0.32      | 10.57          | -0.30      | 12.55          | -0.01      |
| 29   | 14.21          | -0.45      | 8.21           | -0.35      | 10.09          | -0.18      | 10.51          | -0.25      | 13.32          | -0.11      | 12.45          | -0.01      |
| 30   | 8.90           | -0.42      | 12.19          | -0.21      | 9.84           | -0.08      | 9.47           | -0.31      | 13.14          | -0.32      | 6.26           | 0.03       |
| 31   | 8.66           | -0.28      | 12.47          | -0.17      | 8.42           | 0.04       | 9.38           | -0.15      | 9.98           | -0.23      | 11.39          | -0.07      |
| 32   | 19.04          | -0.23      | 12.38          | -0.05      | 12.14          | 0.00       | 11.30          | -0.13      | 11.11          | -0.18      | 7.24           | 0.12       |
| 33   | 18.87          | -0.22      | 10.72          | -0.06      | 12.70          | 0.06       | 9.78           | 0.02       | 11.33          | -0.19      | 16.67          | 0.40       |
| 34   | 18.21          | -0.20      | 9.20           | 0.01       | 12.46          | 0.16       | 9.75           | 0.02       | 11.36          | -0.07      | 15.99          | 0.34       |
| 35   | 14.90          | -0.06      | 6.29           | 0.11       | 14.62          | 0.13       | 8.49           | 0.04       | 9.28           | -0.05      | 10.80          | 0.37       |
| 36   | 15.52          | -0.06      | 9.19           | 0.14       | 10.74          | 0.16       | 14.50          | -0.04      | 11.73          | -0.11      | 18.62          | 0.36       |
| 37   | 13.26          | -0.10      | 9.11           | 0.16       | 15.21          | 0.32       | 18.49          | 0.05       | 9.08           | 0.03       | 9.71           | 0.41       |
| 38   | 11.80          | 0.01       | 13.47          | 0.24       | 15.51          | 0.34       | 15.66          | 0.10       | 13.86          | 0.12       | 11.01          | 0.77       |
| 39   | 12.38          | 0.09       | 14.91          | 0.23       | 14.05          | 0.36       | 14.53          | 0.31       | 13.08          | 0.20       | 9.55           | 0.77       |
| 40   | 10.05          | 0.11       | 10.02          | 0.36       | 13.84          | 0.39       | 9.48           | 0.30       | 14.74          | 0.12       | 9.08           | 0.81       |
| 41   | 13.09          | 0.32       | 9.83           | 0.42       | 12.06          | 0.44       | 10.48          | 0.30       | 12.96          | 0.30       | 6.63           | 1.24       |
| 42   | 25.35          | 0.19       | 9.85           | 0.37       | 12.99          | 0.46       | 9.66           | 0.40       | 8.80           | 0.36       | 8.35           | 1.13       |
| 43   | 19.69          | 0.25       | 11.91          | 0.41       | 12.16          | 0.47       | 16.17          | 0.59       | 10.25          | 0.42       | 8.37           | 1.29       |
| 44   | 17.73          | 0.28       | 11.51          | 0.52       | 8.90           | 0.48       | 11.80          | 0.66       | 13.29          | 0.39       | 6.37           | 1.36       |
| 45   | 7.49           | 0.54       | 18.08          | 0.71       | 9.74           | 0.51       | 6.41           | 0.76       | 11.67          | 0.40       | -              | -          |
| 46   | 9.91           | 0.42       | 15.96          | 0.80       | 8.79           | 0.56       | 14.61          | 0.64       | 9.51           | 0.41       | -              | -          |
| 47   | 13.43          | 0.57       | 15.85          | 0.75       | 6.28           | 0.78       | 10.25          | 0.83       | 12.04          | 0.63       | -              | -          |
| 48   | 14.69          | 0.54       | 12.27          | 0.76       | 21.00          | 0.86       | 8.26           | 0.90       | 12.25          | 0.71       | -              | -          |
| 49   | 17.96          | 0.51       | 11.69          | 0.96       | 20.01          | 0.82       | 9.36           | 0.83       | 7.25           | 0.71       | -              | -          |
| 50   | 8.68           | 0.81       | 12.57          | 0.97       | 11.53          | 0.96       | 11.06          | 1.15       | 7.23           | 0.78       | -              | -          |
| 51   | 5.95           | 0.91       | 10.87          | 0.97       | 11.98          | 0.93       | 9.46           | 1.12       | 8.90           | 0.86       | -              | -          |
| 52   | 10.40          | 0.79       | 10.86          | 0.97       | 10.49          | 0.97       | 9.94           | 1.06       | 12.48          | 1.01       | -              | -          |
| 53   | 18.41          | 1.00       | 15.89          | 1.20       | 7.13           | 1.32       | 7.96           | 1.48       | 11.48          | 1.01       | -              | -          |
| 54   | 20.54          | 0.99       | 17.27          | 1.22       | 7.43           | 1.35       | -              | -          | 8.96           | 1.13       | -              | -          |
| 55   | 11.74          | 1.19       | 10.74          | 1.54       | 6.82           | 1.37       | -              | -          | 9.02           | 1.14       | -              | -          |
| 56   | 14.82          | 1.25       | 11.35          | 1.82       | 8.03           | 1.63       | -              | -          | 6.41           | 1.37       | -              | -          |
| 57   | 11.90          | 1.24       | -              | -          | 9.10           | 1.70       | -              | -          | -              | -          | -              | -          |
| 58   | -              | -          | -              | -          | 6.78           | 1.70       | -              | -          | -              | -          | -              | -          |
| 59   | -              | -          | -              | -          | 8.06           | 1.71       | -              | -          | -              | -          | -              | -          |
