# Supplementary material for: Development of the Korean Developmental Screening Test for Infants and Children (K-DST)
Source: PubMed Central journal article supplement — Clin Exp Pediatr. 2020 May 14;63(11):438–46. doi: 10.3345/cep.2020.00640 (PMC7642140; doi:10.3345/cep.2020.00640), 2020-05-14
Supplement: cep-2020-00640-suppl5.pdf [file cep-2020-00640-suppl5.pdf]

**Supplementary Table 5. Confirmatory Factor analysis according to age group**

| 4-5 Months                              |                |                          |               |                         |       |
|-----------------------------------------|----------------|--------------------------|---------------|-------------------------|-------|
| Factor                                  | Factor loading |                          | Factor        | Factor loading          |       |
| Gross motor                             | 0.624          |                          | Language      | 0.664                   |       |
|                                         | 0.492          |                          |               | 0.608                   |       |
|                                         | 0.616          |                          |               | 0.599                   |       |
|                                         | 0.652          |                          |               | 0.723                   |       |
|                                         | 0.509          |                          |               | 0.339                   |       |
|                                         | 0.669          |                          |               | 0.410                   |       |
|                                         | 0.323          |                          |               | 0.522                   |       |
|                                         | 0.472          |                          |               | 0.526                   |       |
| Fine motor                              | 0.775          |                          | Social skills | 0.610                   |       |
|                                         | 0.635          |                          |               | 0.603                   |       |
|                                         | 0.732          |                          |               | 0.525                   |       |
|                                         | 0.729          |                          |               | 0.635                   |       |
|                                         | 0.595          |                          |               | 0.666                   |       |
|                                         | 0.566          |                          |               | 0.529                   |       |
|                                         | 0.651          |                          |               | 0.294                   |       |
|                                         | 0.453          |                          |               | 0.662                   |       |
| Cognition                               | 0.717          |                          | Self-help     | -                       |       |
|                                         | 0.787          |                          |               | -                       |       |
|                                         | 0.720          |                          |               | -                       |       |
|                                         | 0.689          |                          |               | -                       |       |
|                                         | 0.641          |                          |               | -                       |       |
|                                         | 0.166          |                          |               | -                       |       |
|                                         | 0.486          |                          |               | -                       |       |
|                                         | 0.259          |                          |               | -                       |       |
| Correlation coefficient between factors |                |                          |               |                         |       |
| Gross motor-Fine motor                  | 0.769          | Fine motor-Cognition     | 0.925         | Cognition-Social skills | 0.776 |
| Gross motor-Cognition                   | 0.671          | Fine motor-Language      | 0.834         | Cognition-Self-help     | -     |
| Gross motor-Language                    | 0.881          | Fine motor-Social skills | 0.815         | Language-Social skills  | 0.766 |
| Gross motor-Social skills               | 0.885          | Fine motor-Self-help     | -             | Language-Self-help      | -     |
| Gross motor-Self-help                   | -              | Cognition-Language       | 0.823         | Social skills-Self-help | -     |

Model fit: RMSEA=0.097

RMSEA, root mean square error of approximation.

| 6-7 Months                              |                |                          |               |                         |       |
|-----------------------------------------|----------------|--------------------------|---------------|-------------------------|-------|
| Factor                                  | Factor loading |                          | Factor        | Factor loading          |       |
| Gross motor                             | 0.194          |                          | Language      | 0.712                   |       |
|                                         | 0.219          |                          |               | 0.480                   |       |
|                                         | 0.421          |                          |               | 0.564                   |       |
|                                         | 0.671          |                          |               | 0.458                   |       |
|                                         | 0.568          |                          |               | 0.527                   |       |
|                                         | 0.784          |                          |               | 0.660                   |       |
|                                         | 0.669          |                          |               | 0.626                   |       |
|                                         | 0.622          |                          |               | 0.547                   |       |
| Fine motor                              | 0.741          |                          | Social skills | 0.570                   |       |
|                                         | 0.675          |                          |               | 0.582                   |       |
|                                         | 0.749          |                          |               | 0.488                   |       |
|                                         | 0.725          |                          |               | 0.528                   |       |
|                                         | 0.604          |                          |               | 0.319                   |       |
|                                         | 0.627          |                          |               | 0.587                   |       |
|                                         | 0.477          |                          |               | 0.373                   |       |
|                                         | 0.388          |                          |               | 0.771                   |       |
| Cognition                               | 0.745          |                          | Self-help     | -                       |       |
|                                         | 0.529          |                          |               | -                       |       |
|                                         | 0.673          |                          |               | -                       |       |
|                                         | 0.550          |                          |               | -                       |       |
|                                         | 0.627          |                          |               | -                       |       |
|                                         | 0.485          |                          |               | -                       |       |
|                                         | 0.558          |                          |               | -                       |       |
|                                         | 0.247          |                          |               | -                       |       |
| Correlation coefficient between factors |                |                          |               |                         |       |
| Gross motor-Fine motor                  | 0.587          | Fine motor-Cognition     | 0.995         | Cognition-Social skills | 0.833 |
| Gross motor-Cognition                   | 0.595          | Fine motor-Language      | 0.717         | Cognition-Self-help     | -     |
| Gross motor-Language                    | 0.655          | Fine motor-Social skills | 0.747         | Language-Social skills  | 0.870 |
| Gross motor-Social skills               | 0.649          | Fine motor-Self-help     | -             | Language-Self-help      | -     |
| Gross motor-Self-help                   | -              | Cognition-Language       | 0.837         | Social skills-Self-help | -     |

Model fit: RMSEA=0.089

RMSEA, root mean square error of approximation.

| 8-9 Months                              |                |                          |               |                         |       |
|-----------------------------------------|----------------|--------------------------|---------------|-------------------------|-------|
| Factor                                  | Factor loading |                          | Factor        | Factor loading          |       |
| Gross motor                             | 0.426          |                          | Language      | 0.652                   |       |
|                                         | 0.370          |                          |               | 0.803                   |       |
|                                         | 0.740          |                          |               | 0.560                   |       |
|                                         | 0.816          |                          |               | 0.614                   |       |
|                                         | 0.870          |                          |               | 0.578                   |       |
|                                         | 0.861          |                          |               | 0.656                   |       |
|                                         | 0.881          |                          |               | 0.611                   |       |
|                                         | 0.550          |                          |               | 0.519                   |       |
| Fine motor                              | 0.260          |                          | Social skills | 0.512                   |       |
|                                         | 0.515          |                          |               | 0.574                   |       |
|                                         | 0.483          |                          |               | 0.143                   |       |
|                                         | 0.734          |                          |               | 0.716                   |       |
|                                         | 0.584          |                          |               | 0.550                   |       |
|                                         | 0.662          |                          |               | 0.800                   |       |
|                                         | 0.571          |                          |               | 0.704                   |       |
|                                         | 0.324          |                          |               | 0.584                   |       |
| Cognition                               | 0.526          |                          | Self-help     | -                       |       |
|                                         | 0.398          |                          |               | -                       |       |
|                                         | 0.499          |                          |               | -                       |       |
|                                         | 0.425          |                          |               | -                       |       |
|                                         | 0.574          |                          |               | -                       |       |
|                                         | 0.644          |                          |               | -                       |       |
|                                         | 0.615          |                          |               | -                       |       |
|                                         | 0.671          |                          |               | -                       |       |
| Correlation coefficient between factors |                |                          |               |                         |       |
| Gross motor-Fine motor                  | 0.593          | Fine motor-Cognition     | 0.881         | Cognition-Social skills | 0.885 |
| Gross motor-Cognition                   | 0.658          | Fine motor-Language      | 0.656         | Cognition-Self-help     | -     |
| Gross motor-Language                    | 0.524          | Fine motor-Social skills | 0.693         | Language-Social skills  | 0.850 |
| Gross motor-Social skills               | 0.530          | Fine motor-Self-help     | -             | Language-Self-help      | -     |
| Gross motor-Self-help                   | -              | Cognition-Language       | 0.881         | Social skills-Self-help | -     |

Model fit: RMSEA=0.090

RMSEA, root mean square error of approximation.

| 10-11 Months                            |                |                          |               |                         |       |
|-----------------------------------------|----------------|--------------------------|---------------|-------------------------|-------|
| Factor                                  | Factor loading |                          | Factor        | Factor loading          |       |
| Gross motor                             | 0.120          |                          | Language      | 0.362                   |       |
|                                         | 0.107          |                          |               | 0.272                   |       |
|                                         | 0.280          |                          |               | 0.536                   |       |
|                                         | 0.413          |                          |               | 0.568                   |       |
|                                         | 0.537          |                          |               | 0.594                   |       |
|                                         | 0.621          |                          |               | 0.823                   |       |
|                                         | 0.788          |                          |               | 0.785                   |       |
|                                         | 0.522          |                          |               | 0.668                   |       |
| Fine motor                              | 0.471          |                          | Social skills | 0.323                   |       |
|                                         | 0.469          |                          |               | 0.488                   |       |
|                                         | 0.610          |                          |               | 0.451                   |       |
|                                         | 0.536          |                          |               | 0.398                   |       |
|                                         | 0.648          |                          |               | 0.608                   |       |
|                                         | 0.426          |                          |               | 0.667                   |       |
|                                         | 0.647          |                          |               | 0.758                   |       |
|                                         | 0.535          |                          |               | 0.585                   |       |
| Cognition                               | 0.508          |                          | Self-help     | -                       |       |
|                                         | 0.359          |                          |               | -                       |       |
|                                         | 0.531          |                          |               | -                       |       |
|                                         | 0.379          |                          |               | -                       |       |
|                                         | 0.658          |                          |               | -                       |       |
|                                         | 0.612          |                          |               | -                       |       |
|                                         | 0.616          |                          |               | -                       |       |
|                                         | 0.711          |                          |               | -                       |       |
| Correlation coefficient between factors |                |                          |               |                         |       |
| Gross motor-Fine motor                  | 0.481          | Fine motor-Cognition     | 0.829         | Cognition-Social skills | 0.789 |
| Gross motor-Cognition                   | 0.616          | Fine motor-Language      | 0.700         | Cognition-Self-help     | -     |
| Gross motor-Language                    | 0.522          | Fine motor-Social skills | 0.690         | Language-Social skills  | 0.895 |
| Gross motor-Social skills               | 0.527          | Fine motor-Self-help     | -             | Language-Self-help      | -     |
| Gross motor-Self-help                   | -              | Cognition-Language       | 0.641         | Social skills-Self-help | -     |

Model fit: RMSEA=0.080

RMSEA, root mean square error of approximation.

| 12-13 Months                                                                                         |                |                          |               |                         |       |
|------------------------------------------------------------------------------------------------------|----------------|--------------------------|---------------|-------------------------|-------|
| Factor                                                                                               | Factor loading |                          | Factor        | Factor loading          |       |
| Gross motor                                                                                          | 0.486          |                          | Language      | 0.441                   |       |
|                                                                                                      | 0.498          |                          |               | 0.514                   |       |
|                                                                                                      | 0.767          |                          |               | 0.428                   |       |
|                                                                                                      | 0.794          |                          |               | 0.564                   |       |
|                                                                                                      | 0.862          |                          |               | 0.690                   |       |
|                                                                                                      | 0.849          |                          |               | 0.621                   |       |
|                                                                                                      | 0.819          |                          |               | 0.659                   |       |
|                                                                                                      | 0.744          |                          |               | 0.753                   |       |
| Fine motor                                                                                           | 0.616          |                          | Social skills | 0.528                   |       |
|                                                                                                      | 0.655          |                          |               | 0.549                   |       |
|                                                                                                      | 0.617          |                          |               | 0.585                   |       |
|                                                                                                      | 0.646          |                          |               | 0.605                   |       |
|                                                                                                      | 0.657          |                          |               | 0.691                   |       |
|                                                                                                      | 0.679          |                          |               | 0.620                   |       |
|                                                                                                      | 0.673          |                          |               | 0.670                   |       |
|                                                                                                      | 0.606          |                          |               | 0.634                   |       |
| Cognition                                                                                            | 0.417          |                          | Self-help     | -                       |       |
|                                                                                                      | 0.414          |                          |               | -                       |       |
|                                                                                                      | 0.643          |                          |               | -                       |       |
|                                                                                                      | 0.509          |                          |               | -                       |       |
|                                                                                                      | 0.477          |                          |               | -                       |       |
|                                                                                                      | 0.539          |                          |               | -                       |       |
|                                                                                                      | 0.654          |                          |               | -                       |       |
|                                                                                                      | 0.320          |                          |               | -                       |       |
| Correlation coefficient between factors                                                              |                |                          |               |                         |       |
| Gross motor-Fine motor                                                                               | 0.493          | Fine motor-Cognition     | 0.967         | Cognition-Social skills | 0.797 |
| Gross motor-Cognition                                                                                | 0.388          | Fine motor-Language      | 0.652         | Cognition-Self-help     | -     |
| Gross motor-Language                                                                                 | 0.511          | Fine motor-Social skills | 0.667         | Language-Social skills  | 0.925 |
| Gross motor-Social skills                                                                            | 0.474          | Fine motor-Self-help     | -             | Language-Self-help      | -     |
| Gross motor-Self-help                                                                                | -              | Cognition-Language       | 0.666         | Social skills-Self-help | -     |
| Model fit: RMSEA=0.088                                                                               |                |                          |               |                         |       |
| CFI, comparative fit index; TLI, Tucker-Lewis index; RMSEA, root mean square error of approximation. |                |                          |               |                         |       |

| 14-15 Months                            |                |                          |               |                         |       |
|-----------------------------------------|----------------|--------------------------|---------------|-------------------------|-------|
| Factor                                  | Factor loading |                          | Factor        | Factor loading          |       |
| Gross motor                             | 0.731          |                          | Language      | 0.520                   |       |
|                                         | 0.578          |                          |               | 0.308                   |       |
|                                         | 0.883          |                          |               | 0.627                   |       |
|                                         | 0.566          |                          |               | 0.488                   |       |
|                                         | 0.722          |                          |               | 0.625                   |       |
|                                         | 0.786          |                          |               | 0.648                   |       |
|                                         | 0.520          |                          |               | 0.889                   |       |
|                                         | 0.343          |                          | 0.870         |                         |       |
| Fine motor                              | 0.411          |                          | Social skills | 0.374                   |       |
|                                         | 0.360          |                          |               | 0.579                   |       |
|                                         | 0.382          |                          |               | 0.515                   |       |
|                                         | 0.477          |                          |               | 0.578                   |       |
|                                         | 0.720          |                          |               | 0.644                   |       |
|                                         | 0.589          |                          |               | 0.403                   |       |
|                                         | 0.468          |                          |               | 0.600                   |       |
|                                         | 0.572          |                          | 0.573         |                         |       |
| Cognition                               | 0.352          |                          | Self-help     | -                       |       |
|                                         | 0.493          |                          |               | -                       |       |
|                                         | 0.135          |                          |               | -                       |       |
|                                         | 0.114          |                          |               | -                       |       |
|                                         | 0.252          |                          |               | -                       |       |
|                                         | 0.571          |                          |               | -                       |       |
|                                         | 0.763          |                          |               | -                       |       |
|                                         | 0.799          |                          | -             |                         |       |
| Correlation coefficient between factors |                |                          |               |                         |       |
| Gross motor-Fine motor                  | 0.412          | Fine motor-Cognition     | 0.804         | Cognition-Social skills | 0.688 |
| Gross motor-Cognition                   | 0.379          | Fine motor-Language      | 0.602         | Cognition-Self-help     | -     |
| Gross motor-Language                    | 0.327          | Fine motor-Social skills | 0.623         | Language-Social skills  | 0.708 |
| Gross motor-Social skills               | 0.186          | Fine motor-Self-help     | -             | Language-Self-help      | -     |
| Gross motor-Self-help                   | -              | Cognition-Language       | 0.961         | Social skills-Self-help | -     |

Model fit: RMSEA=0.081

RMSEA, root mean square error of approximation.

| 16-17 Months                            |                |                          |               |                         |       |
|-----------------------------------------|----------------|--------------------------|---------------|-------------------------|-------|
| Factor                                  | Factor loading |                          | Factor        | Factor loading          |       |
| Gross motor                             | 0.862          |                          | Language      | 0.618                   |       |
|                                         | 0.858          |                          |               | 0.706                   |       |
|                                         | 0.852          |                          |               | 0.668                   |       |
|                                         | 0.647          |                          |               | 0.646                   |       |
|                                         | 0.818          |                          |               | 0.649                   |       |
|                                         | 0.657          |                          |               | 0.728                   |       |
|                                         | 0.595          |                          |               | 0.727                   |       |
|                                         | 0.603          |                          |               | 0.658                   |       |
| Fine motor                              | 0.762          |                          | Social skills | 0.587                   |       |
|                                         | 0.683          |                          |               | 0.587                   |       |
|                                         | 0.623          |                          |               | 0.714                   |       |
|                                         | 0.719          |                          |               | 0.752                   |       |
|                                         | 0.765          |                          |               | 0.633                   |       |
|                                         | 0.714          |                          |               | 0.566                   |       |
|                                         | 0.590          |                          |               | 0.639                   |       |
|                                         | 0.525          |                          |               | 0.697                   |       |
| Cognition                               | 0.487          |                          | Self-help     | -                       |       |
|                                         | 0.506          |                          |               | -                       |       |
|                                         | 0.641          |                          |               | -                       |       |
|                                         | 0.620          |                          |               | -                       |       |
|                                         | 0.715          |                          |               | -                       |       |
|                                         | 0.692          |                          |               | -                       |       |
|                                         | 0.689          |                          |               | -                       |       |
|                                         | 0.765          |                          |               | -                       |       |
| Correlation coefficient between factors |                |                          |               |                         |       |
| Gross motor-Fine motor                  | 0.954          | Fine motor-Cognition     | 0.793         | Cognition-Social skills | 0.914 |
| Gross motor-Cognition                   | 0.709          | Fine motor-Language      | 0.741         | Cognition-Self-help     | -     |
| Gross motor-Language                    | 0.684          | Fine motor-Social skills | 0.868         | Language-Social skills  | 0.875 |
| Gross motor-Social skills               | 0.831          | Fine motor-Self-help     | -             | Language-Self-help      | -     |
| Gross motor-Self-help                   | -              | Cognition-Language       | 0.941         | Social skills-Self-help | -     |

Model fit: RMSEA=0.092

RMSEA, root mean square error of approximation.

| 18-19 Months                            |                |                          |               |                         |       |
|-----------------------------------------|----------------|--------------------------|---------------|-------------------------|-------|
| Factor                                  | Factor loading |                          | Factor        | Factor loading          |       |
| Gross motor                             | 0.656          |                          | Language      | 0.655                   |       |
|                                         | 0.574          |                          |               | 0.727                   |       |
|                                         | 0.573          |                          |               | 0.808                   |       |
|                                         | 0.681          |                          |               | 0.801                   |       |
|                                         | 0.702          |                          |               | 0.752                   |       |
|                                         | 0.671          |                          |               | 0.661                   |       |
|                                         | 0.588          |                          |               | 0.537                   |       |
|                                         | 0.420          |                          |               | 0.602                   |       |
| Fine motor                              | 0.628          |                          | Social skills | 0.718                   |       |
|                                         | 0.806          |                          |               | 0.636                   |       |
|                                         | 0.623          |                          |               | 0.646                   |       |
|                                         | 0.672          |                          |               | 0.818                   |       |
|                                         | 0.686          |                          |               | 0.751                   |       |
|                                         | 0.722          |                          |               | 0.749                   |       |
|                                         | 0.624          |                          |               | 0.768                   |       |
|                                         | 0.635          |                          |               | 0.756                   |       |
| Cognition                               | 0.690          |                          | Self-help     | 0.658                   |       |
|                                         | 0.687          |                          |               | 0.500                   |       |
|                                         | 0.709          |                          |               | 0.557                   |       |
|                                         | 0.764          |                          |               | 0.651                   |       |
|                                         | 0.742          |                          |               | 0.595                   |       |
|                                         | 0.783          |                          |               | 0.817                   |       |
|                                         | 0.766          |                          |               | 0.529                   |       |
|                                         | 0.780          |                          |               | 0.668                   |       |
| Correlation coefficient between factors |                |                          |               |                         |       |
| Gross motor-Fine motor                  | 0.972          | Fine motor-Cognition     | 0.733         | Cognition-Social skills | 0.977 |
| Gross motor-Cognition                   | 0.655          | Fine motor-Language      | 0.693         | Cognition-Self-help     | 0.933 |
| Gross motor-Language                    | 0.628          | Fine motor-Social skills | 0.672         | Language-Social skills  | 0.911 |
| Gross motor-Social skills               | 0.639          | Fine motor-Self-help     | 0.815         | Language-Self-help      | 0.925 |
| Gross motor-Self-help                   | 0.780          | Cognition-Language       | 0.967         | Social skills-Self-help | 0.948 |

Model fit: RMSEA=0.085

RMSEA, root mean square error of approximation.



| 20-21 Months                            |                |                          |               |                         |       |
|-----------------------------------------|----------------|--------------------------|---------------|-------------------------|-------|
| Factor                                  | Factor loading |                          | Factor        | Factor loading          |       |
| Gross motor                             | 0.585          |                          | Language      | 0.360                   |       |
|                                         | 0.540          |                          |               | 0.444                   |       |
|                                         | 0.654          |                          |               | 0.670                   |       |
|                                         | 0.737          |                          |               | 0.846                   |       |
|                                         | 0.687          |                          |               | 0.846                   |       |
|                                         | 0.656          |                          |               | 0.766                   |       |
|                                         | 0.558          |                          |               | 0.855                   |       |
|                                         | 0.463          |                          |               | 0.872                   |       |
| Fine motor                              | 0.771          |                          | Social skills | 0.718                   |       |
|                                         | 0.751          |                          |               | 0.636                   |       |
|                                         | 0.614          |                          |               | 0.646                   |       |
|                                         | 0.560          |                          |               | 0.818                   |       |
|                                         | 0.636          |                          |               | 0.751                   |       |
|                                         | 0.580          |                          |               | 0.749                   |       |
|                                         | 0.599          |                          |               | 0.768                   |       |
|                                         | 0.459          |                          |               | 0.756                   |       |
| Cognition                               | 0.636          |                          | Self-help     | 0.633                   |       |
|                                         | 0.623          |                          |               | 0.684                   |       |
|                                         | 0.644          |                          |               | 0.584                   |       |
|                                         | 0.649          |                          |               | 0.599                   |       |
|                                         | 0.638          |                          |               | 0.517                   |       |
|                                         | 0.595          |                          |               | 0.633                   |       |
|                                         | 0.641          |                          |               | 0.615                   |       |
|                                         | 0.610          |                          |               | 0.613                   |       |
| Correlation coefficient between factors |                |                          |               |                         |       |
| Gross motor-Fine motor                  | 0.956          | Fine motor-Cognition     | 0.842         | Cognition-Social skills | 0.902 |
| Gross motor-Cognition                   | 0.871          | Fine motor-Language      | 0.404         | Cognition-Self-help     | 0.815 |
| Gross motor-Language                    | 0.526          | Fine motor-Social skills | 0.792         | Language-Social skills  | 0.651 |
| Gross motor-Social skills               | 0.770          | Fine motor-Self-help     | 0.867         | Language-Self-help      | 0.581 |
| Gross motor-Self-help                   | 0.789          | Cognition-Language       | 0.696         | Social skills-Self-help | 0.771 |

Model fit: RMSEA=0.085

RMSEA, root mean square error of approximation.

| 22-23 Months                            |                |                          |               |                         |       |
|-----------------------------------------|----------------|--------------------------|---------------|-------------------------|-------|
| Factor                                  | Factor loading |                          | Factor        | Factor loading          |       |
| Gross motor                             | 0.644          |                          | Language      | 0.709                   |       |
|                                         | 0.814          |                          |               | 0.847                   |       |
|                                         | 0.689          |                          |               | 0.858                   |       |
|                                         | 0.703          |                          |               | 0.796                   |       |
|                                         | 0.598          |                          |               | 0.815                   |       |
|                                         | 0.775          |                          |               | 0.739                   |       |
|                                         | 0.720          |                          |               | 0.824                   |       |
|                                         | 0.701          |                          |               | 0.629                   |       |
| Fine motor                              | 0.705          |                          | Social skills | 0.676                   |       |
|                                         | 0.630          |                          |               | 0.658                   |       |
|                                         | 0.744          |                          |               | 0.643                   |       |
|                                         | 0.684          |                          |               | 0.711                   |       |
|                                         | 0.703          |                          |               | 0.721                   |       |
|                                         | 0.689          |                          |               | 0.738                   |       |
|                                         | 0.675          |                          |               | 0.765                   |       |
|                                         | 0.673          |                          |               | 0.853                   |       |
| Cognition                               | 0.691          |                          | Self-help     | 0.856                   |       |
|                                         | 0.640          |                          |               | 0.658                   |       |
|                                         | 0.729          |                          |               | 0.759                   |       |
|                                         | 0.652          |                          |               | 0.713                   |       |
|                                         | 0.701          |                          |               | 0.677                   |       |
|                                         | 0.604          |                          |               | 0.621                   |       |
|                                         | 0.686          |                          |               | 0.782                   |       |
|                                         | 0.665          |                          |               | 0.741                   |       |
| Correlation coefficient between factors |                |                          |               |                         |       |
| Gross motor-Fine motor                  | 0.981          | Fine motor-Cognition     | 0.972         | Cognition-Social skills | 0.935 |
| Gross motor-Cognition                   | 0.915          | Fine motor-Language      | 0.675         | Cognition-Self-help     | 0.797 |
| Gross motor-Language                    | 0.677          | Fine motor-Social skills | 0.852         | Language-Social skills  | 0.920 |
| Gross motor-Social skills               | 0.814          | Fine motor-Self-help     | 0.751         | Language-Self-help      | 0.645 |
| Gross motor-Self-help                   | 0.792          | Cognition-Language       | 0.808         | Social skills-Self-help | 0.801 |

Model fit: RMSEA=0.074

RMSEA, root mean square error of approximation.

| 24-26 Months                            |                |                          |               |                         |       |
|-----------------------------------------|----------------|--------------------------|---------------|-------------------------|-------|
| Factor                                  | Factor loading |                          | Factor        | Factor loading          |       |
| Gross motor                             | 0.642          |                          | Language      | 0.809                   |       |
|                                         | 0.583          |                          |               | 0.888                   |       |
|                                         | 0.451          |                          |               | 0.830                   |       |
|                                         | 0.620          |                          |               | 0.909                   |       |
|                                         | 0.663          |                          |               | 0.723                   |       |
|                                         | 0.603          |                          |               | 0.748                   |       |
|                                         | 0.627          |                          |               | 0.520                   |       |
|                                         | 0.676          |                          |               | 0.519                   |       |
| Fine motor                              | 0.465          |                          | Social skills | 0.669                   |       |
|                                         | 0.556          |                          |               | 0.636                   |       |
|                                         | 0.528          |                          |               | 0.663                   |       |
|                                         | 0.311          |                          |               | 0.647                   |       |
|                                         | 0.603          |                          |               | 0.562                   |       |
|                                         | 0.584          |                          |               | 0.763                   |       |
|                                         | 0.635          |                          |               | 0.979                   |       |
|                                         | 0.655          |                          |               | 0.975                   |       |
| Cognition                               | 0.689          |                          | Self-help     | 0.573                   |       |
|                                         | 0.663          |                          |               | 0.608                   |       |
|                                         | 0.658          |                          |               | 0.603                   |       |
|                                         | 0.747          |                          |               | 0.652                   |       |
|                                         | 0.637          |                          |               | 0.656                   |       |
|                                         | 0.533          |                          |               | 0.632                   |       |
|                                         | 0.739          |                          |               | 0.616                   |       |
|                                         | 0.659          |                          |               | 0.631                   |       |
| Correlation coefficient between factors |                |                          |               |                         |       |
| Gross motor-Fine motor                  | 0.745          | Fine motor-Cognition     | 0.770         | Cognition-Social skills | 0.691 |
| Gross motor-Cognition                   | 0.561          | Fine motor-Language      | 0.570         | Cognition-Self-help     | 0.720 |
| Gross motor-Language                    | 0.513          | Fine motor-Social skills | 0.578         | Language-Social skills  | 0.704 |
| Gross motor-Social skills               | 0.451          | Fine motor-Self-help     | 0.842         | Language-Self-help      | 0.585 |
| Gross motor-Self-help                   | 0.668          | Cognition-Language       | 0.742         | Social skills-Self-help | 0.553 |

Model fit: RMSEA=0.075

RMSEA, root mean square error of approximation.

| 27-29 Months                            |                |                          |               |                         |       |
|-----------------------------------------|----------------|--------------------------|---------------|-------------------------|-------|
| Factor                                  | Factor loading |                          | Factor        | Factor loading          |       |
| Gross motor                             | 0.643          |                          | Language      | 0.874                   |       |
|                                         | 0.679          |                          |               | 0.856                   |       |
|                                         | 0.430          |                          |               | 0.762                   |       |
|                                         | 0.685          |                          |               | 0.476                   |       |
|                                         | 0.490          |                          |               | 0.412                   |       |
|                                         | 0.741          |                          |               | 0.748                   |       |
|                                         | 0.655          |                          |               | 0.781                   |       |
| Fine motor                              | 0.698          |                          | Social skills | 0.902                   |       |
|                                         | 0.395          |                          |               | 0.744                   |       |
|                                         | 0.424          |                          |               | 0.712                   |       |
|                                         | 0.498          |                          |               | 0.634                   |       |
|                                         | 0.612          |                          |               | 0.776                   |       |
|                                         | 0.578          |                          |               | 0.679                   |       |
|                                         | 0.615          |                          |               | 0.649                   |       |
| Cognition                               | 0.510          |                          | Self-help     | 0.873                   |       |
|                                         | 0.416          |                          |               | 0.904                   |       |
|                                         | 0.445          |                          |               | 0.706                   |       |
|                                         | 0.599          |                          |               | 0.729                   |       |
|                                         | 0.629          |                          |               | 0.473                   |       |
|                                         | 0.618          |                          |               | 0.701                   |       |
|                                         | 0.783          |                          |               | 0.687                   |       |
| 0.652                                   |                | 0.698                    |               |                         |       |
| 0.537                                   |                | 0.707                    |               |                         |       |
| 0.774                                   |                | 0.697                    |               |                         |       |
| Correlation coefficient between factors |                |                          |               |                         |       |
| Gross motor-Fine motor                  | 0.726          | Fine motor-Cognition     | 0.700         | Cognition-Social skills | 0.562 |
| Gross motor-Cognition                   | 0.469          | Fine motor-Language      | 0.659         | Cognition-Self-help     | 0.413 |
| Gross motor-Language                    | 0.345          | Fine motor-Social skills | 0.750         | Language-Social skills  | 0.859 |
| Gross motor-Social skills               | 0.418          | Fine motor-Self-help     | 0.802         | Language-Self-help      | 0.611 |
| Gross motor-Self-help                   | 0.492          | Cognition-Language       | 0.620         | Social skills-Self-help | 0.636 |

Model fit: RMSEA=0.065

RMSEA, root mean square error of approximation

| 30-32 Months                            |                |                          |               |                         |       |
|-----------------------------------------|----------------|--------------------------|---------------|-------------------------|-------|
| Factor                                  | Factor loading |                          | Factor        | Factor loading          |       |
| Gross motor                             | 0.372          |                          | Language      | 0.642                   |       |
|                                         | 0.263          |                          |               | 0.337                   |       |
|                                         | 0.454          |                          |               | 0.642                   |       |
|                                         | 0.852          |                          |               | 0.834                   |       |
|                                         | 0.529          |                          |               | 0.768                   |       |
|                                         | 0.870          |                          |               | 0.858                   |       |
|                                         | 0.752          |                          |               | 0.648                   |       |
|                                         | 0.300          |                          |               | 0.655                   |       |
| Fine motor                              | 0.406          |                          | Social skills | 0.627                   |       |
|                                         | 0.605          |                          |               | 0.665                   |       |
|                                         | 0.597          |                          |               | 0.724                   |       |
|                                         | 0.595          |                          |               | 0.763                   |       |
|                                         | 0.520          |                          |               | 0.738                   |       |
|                                         | 0.686          |                          |               | 0.675                   |       |
|                                         | 0.497          |                          |               | 0.824                   |       |
|                                         | 0.652          |                          |               | 0.647                   |       |
| Cognition                               | 0.633          |                          | Self-help     | 0.634                   |       |
|                                         | 0.846          |                          |               | 0.696                   |       |
|                                         | 0.490          |                          |               | 0.546                   |       |
|                                         | 0.875          |                          |               | 0.560                   |       |
|                                         | 0.752          |                          |               | 0.593                   |       |
|                                         | 0.783          |                          |               | 0.686                   |       |
|                                         | 0.686          |                          |               | 0.554                   |       |
|                                         | 0.667          |                          |               | 0.568                   |       |
| Correlation coefficient between factors |                |                          |               |                         |       |
| Gross motor-Fine motor                  | 0.559          | Fine motor-Cognition     | 0.554         | Cognition-Social skills | 0.761 |
| Gross motor-Cognition                   | 0.295          | Fine motor-Language      | 0.458         | Cognition-Self-help     | 0.587 |
| Gross motor-Language                    | 0.311          | Fine motor-Social skills | 0.648         | Language-Social skills  | 0.862 |
| Gross motor-Social skills               | 0.337          | Fine motor-Self-help     | 0.767         | Language-Self-help      | 0.632 |
| Gross motor-Self-help                   | 0.418          | Cognition-Language       | 0.780         | Social skills-Self-help | 0.757 |

Model fit: RMSEA=0.082

RMSEA, root mean square error of approximation.

| 36-41 Months                            |                |                          |               |                         |       |
|-----------------------------------------|----------------|--------------------------|---------------|-------------------------|-------|
| Factor                                  | Factor loading |                          | Factor        | Factor loading          |       |
| Gross motor                             | 0.541          |                          | Language      | 0.775                   |       |
|                                         | 0.631          |                          |               | 0.832                   |       |
|                                         | 0.448          |                          |               | 0.797                   |       |
|                                         | 0.632          |                          |               | 0.813                   |       |
|                                         | 0.641          |                          |               | 0.863                   |       |
|                                         | 0.611          |                          |               | 0.842                   |       |
|                                         | 0.379          |                          |               | 0.765                   |       |
|                                         | 0.588          |                          |               | 0.796                   |       |
| Fine motor                              | 0.540          |                          | Social skills | 0.720                   |       |
|                                         | 0.689          |                          |               | 0.682                   |       |
|                                         | 0.751          |                          |               | 0.653                   |       |
|                                         | 0.748          |                          |               | 0.599                   |       |
|                                         | 0.722          |                          |               | 0.801                   |       |
|                                         | 0.692          |                          |               | 0.826                   |       |
|                                         | 0.432          |                          |               | 0.774                   |       |
|                                         | 0.745          |                          |               | 0.753                   |       |
| Cognition                               | 0.664          |                          | Self-help     | 0.777                   |       |
|                                         | 0.663          |                          |               | 0.562                   |       |
|                                         | 0.643          |                          |               | 0.734                   |       |
|                                         | 0.677          |                          |               | 0.704                   |       |
|                                         | 0.769          |                          |               | 0.659                   |       |
|                                         | 0.657          |                          |               | 0.785                   |       |
|                                         | 0.521          |                          |               | 0.671                   |       |
|                                         | 0.544          |                          |               | 0.695                   |       |
| Correlation coefficient between factors |                |                          |               |                         |       |
| Gross motor-Fine motor                  | 0.714          | Fine motor-Cognition     | 0.769         | Cognition-Social skills | 0.852 |
| Gross motor-Cognition                   | 0.736          | Fine motor-Language      | 0.627         | Cognition-Self-help     | 0.596 |
| Gross motor-Language                    | 0.542          | Fine motor-Social skills | 0.638         | Language-Social skills  | 0.785 |
| Gross motor-Social skills               | 0.629          | Fine motor-Self-help     | 0.735         | Language-Self-help      | 0.517 |
| Gross motor-Self-help                   | 0.656          | Cognition-Language       | 0.848         | Social skills-Self-help | 0.652 |

Model fit: RMSEA=0.059

RMSEA, root mean square error of approximation.

| 42-47 Months                            |                |                          |               |                         |       |
|-----------------------------------------|----------------|--------------------------|---------------|-------------------------|-------|
| Factor                                  | Factor loading |                          | Factor        | Factor loading          |       |
| Gross motor                             | 0.517          |                          | Language      | 0.654                   |       |
|                                         | 0.432          |                          |               | 0.762                   |       |
|                                         | 0.548          |                          |               | 0.654                   |       |
|                                         | 0.683          |                          |               | 0.671                   |       |
|                                         | 0.464          |                          |               | 0.768                   |       |
|                                         | 0.693          |                          |               | 0.645                   |       |
|                                         | 0.420          |                          |               | 0.645                   |       |
|                                         | 0.498          |                          |               | 0.777                   |       |
| Fine motor                              | 0.563          |                          | Social skills | 0.822                   |       |
|                                         | 0.762          |                          |               | 0.672                   |       |
|                                         | 0.775          |                          |               | 0.739                   |       |
|                                         | 0.769          |                          |               | 0.782                   |       |
|                                         | 0.766          |                          |               | 0.608                   |       |
|                                         | 0.739          |                          |               | 0.653                   |       |
|                                         | 0.756          |                          |               | 0.350                   |       |
|                                         | 0.521          |                          |               | 0.614                   |       |
| Cognition                               | 0.713          |                          | Self-help     | 0.659                   |       |
|                                         | 0.689          |                          |               | 0.577                   |       |
|                                         | 0.680          |                          |               | 0.779                   |       |
|                                         | 0.644          |                          |               | 0.755                   |       |
|                                         | 0.630          |                          |               | 0.749                   |       |
|                                         | 0.658          |                          |               | 0.644                   |       |
|                                         | 0.576          |                          |               | 0.646                   |       |
|                                         | 0.560          |                          |               | 0.439                   |       |
| Correlation coefficient between factors |                |                          |               |                         |       |
| Gross motor-Fine motor                  | 0.594          | Fine motor-Cognition     | 0.793         | Cognition-Social skills | 0.951 |
| Gross motor-Cognition                   | 0.527          | Fine motor-Language      | 0.679         | Cognition-Self-help     | 0.585 |
| Gross motor-Language                    | 0.537          | Fine motor-Social skills | 0.706         | Language-Social skills  | 0.871 |
| Gross motor-Social skills               | 0.555          | Fine motor-Self-help     | 0.710         | Language-Self-help      | 0.597 |
| Gross motor-Self-help                   | 0.623          | Cognition-Language       | 0.850         | Social skills-Self-help | 0.604 |

Model fit: RMSEA=0.056

RMSEA, root mean square error of approximation

| 48-53 Months                            |                |                          |               |                         |       |
|-----------------------------------------|----------------|--------------------------|---------------|-------------------------|-------|
| Factor                                  | Factor loading |                          | Factor        | Factor loading          |       |
| Gross motor                             | 0.643          |                          | Language      | 0.714                   |       |
|                                         | 0.318          |                          |               | 0.759                   |       |
|                                         | 0.729          |                          |               | 0.842                   |       |
|                                         | 0.524          |                          |               | 0.823                   |       |
|                                         | 0.563          |                          |               | 0.770                   |       |
|                                         | 0.588          |                          |               | 0.639                   |       |
|                                         | 0.637          |                          |               | 0.786                   |       |
|                                         | 0.594          |                          |               | 0.610                   |       |
| Fine motor                              | 0.703          |                          | Social skills | 0.828                   |       |
|                                         | 0.758          |                          |               | 0.728                   |       |
|                                         | 0.761          |                          |               | 0.738                   |       |
|                                         | 0.760          |                          |               | 0.662                   |       |
|                                         | 0.780          |                          |               | 0.687                   |       |
|                                         | 0.760          |                          |               | 0.559                   |       |
|                                         | 0.776          |                          |               | 0.732                   |       |
|                                         | 0.580          |                          |               | 0.834                   |       |
| Cognition                               | 0.668          |                          | Self-help     | 0.612                   |       |
|                                         | 0.722          |                          |               | 0.801                   |       |
|                                         | 0.533          |                          |               | 0.693                   |       |
|                                         | 0.694          |                          |               | 0.758                   |       |
|                                         | 0.662          |                          |               | 0.572                   |       |
|                                         | 0.620          |                          |               | 0.434                   |       |
|                                         | 0.425          |                          |               | 0.695                   |       |
|                                         | 0.412          |                          |               | 0.700                   |       |
| Correlation coefficient between factors |                |                          |               |                         |       |
| Gross motor-Fine motor                  | 0.758          | Fine motor-Cognition     | 0.889         | Cognition-Social skills | 0.893 |
| Gross motor-Cognition                   | 0.736          | Fine motor-Language      | 0.792         | Cognition-Self-help     | 0.813 |
| Gross motor-Language                    | 0.775          | Fine motor-Social skills | 0.785         | Language-Social skills  | 0.877 |
| Gross motor-Social skills               | 0.734          | Fine motor-Self-help     | 0.870         | Language-Self-help      | 0.821 |
| Gross motor-Self-help                   | 0.757          | Cognition-Language       | 0.921         | Social skills-Self-help | 0.817 |

Model fit: RMSEA=0.056

RMSEA, root mean square error of approximation.



| 54-59 Months                            |                |                          |               |                         |       |
|-----------------------------------------|----------------|--------------------------|---------------|-------------------------|-------|
| Factor                                  | Factor loading |                          | Factor        | Factor loading          |       |
| Gross motor                             | 0.580          |                          | Language      | 0.756                   |       |
|                                         | 0.633          |                          |               | 0.620                   |       |
|                                         | 0.570          |                          |               | 0.703                   |       |
|                                         | 0.630          |                          |               | 0.733                   |       |
|                                         | 0.625          |                          |               | 0.729                   |       |
|                                         | 0.626          |                          |               | 0.491                   |       |
|                                         | 0.642          |                          |               | 0.600                   |       |
|                                         | 0.523          |                          |               | 0.485                   |       |
| Fine motor                              | 0.590          |                          | Social skills | 0.477                   |       |
|                                         | 0.726          |                          |               | 0.519                   |       |
|                                         | 0.608          |                          |               | 0.750                   |       |
|                                         | 0.620          |                          |               | 0.754                   |       |
|                                         | 0.639          |                          |               | 0.825                   |       |
|                                         | 0.708          |                          |               | 0.520                   |       |
|                                         | 0.786          |                          |               | 0.401                   |       |
| 0.753                                   |                | 0.549                    |               |                         |       |
| Cognition                               | 0.618          |                          | Self-help     | 0.708                   |       |
|                                         | 0.423          |                          |               | 0.576                   |       |
|                                         | 0.348          |                          |               | 0.416                   |       |
|                                         | 0.726          |                          |               | 0.388                   |       |
|                                         | 0.706          |                          |               | 0.638                   |       |
|                                         | 0.551          |                          |               | 0.733                   |       |
|                                         | 0.512          |                          |               | 0.656                   |       |
| 0.594                                   |                | 0.661                    |               |                         |       |
| Correlation coefficient between factors |                |                          |               |                         |       |
| Gross motor-Fine motor                  | 0.525          | Fine motor-Cognition     | 0.748         | Cognition-Social skills | 0.777 |
| Gross motor-Cognition                   | 0.509          | Fine motor-Language      | 0.724         | Cognition-Self-help     | 0.738 |
| Gross motor-Language                    | 0.513          | Fine motor-Social skills | 0.692         | Language-Social skills  | 0.794 |
| Gross motor-Social skills               | 0.458          | Fine motor-Self-help     | 0.722         | Language-Self-help      | 0.619 |
| Gross motor-Self-help                   | 0.551          | Cognition-Language       | 0.933         | Social skills-Self-help | 0.722 |

Model fit: RMSEA=0.052

RMSEA, root mean square error of approximation.

| 60-65 Months                            |                |                          |               |                         |       |
|-----------------------------------------|----------------|--------------------------|---------------|-------------------------|-------|
| Factor                                  | Factor loading |                          | Factor        | Factor loading          |       |
| Gross motor                             | 0.686          |                          | Language      | 0.587                   |       |
|                                         | 0.657          |                          |               | 0.569                   |       |
|                                         | 0.686          |                          |               | 0.717                   |       |
|                                         | 0.705          |                          |               | 0.646                   |       |
|                                         | 0.761          |                          |               | 0.644                   |       |
|                                         | 0.479          |                          |               | 0.644                   |       |
|                                         | 0.737          |                          |               | 0.671                   |       |
|                                         | 0.627          |                          |               | 0.558                   |       |
| Fine motor                              | 0.762          |                          | Social skills | 0.487                   |       |
|                                         | 0.639          |                          |               | 0.733                   |       |
|                                         | 0.600          |                          |               | 0.829                   |       |
|                                         | 0.807          |                          |               | 0.804                   |       |
|                                         | 0.768          |                          |               | 0.557                   |       |
|                                         | 0.802          |                          |               | 0.397                   |       |
|                                         | 0.442          |                          |               | 0.516                   |       |
|                                         | 0.813          |                          |               | 0.546                   |       |
| Cognition                               | 0.500          |                          | Self-help     | 0.337                   |       |
|                                         | 0.795          |                          |               | 0.592                   |       |
|                                         | 0.757          |                          |               | 0.725                   |       |
|                                         | 0.523          |                          |               | 0.673                   |       |
|                                         | 0.525          |                          |               | 0.637                   |       |
|                                         | 0.612          |                          |               | 0.677                   |       |
|                                         | 0.549          |                          |               | 0.415                   |       |
|                                         | 0.455          |                          |               | 0.451                   |       |
| Correlation coefficient between factors |                |                          |               |                         |       |
| Gross motor-Fine motor                  | 0.672          | Fine motor-Cognition     | 0.792         | Cognition-Social skills | 0.700 |
| Gross motor-Cognition                   | 0.719          | Fine motor-Language      | 0.735         | Cognition-Self-help     | 0.718 |
| Gross motor-Language                    | 0.514          | Fine motor-Social skills | 0.596         | Language-Social skills  | 0.744 |
| Gross motor-Social skills               | 0.580          | Fine motor-Self-help     | 0.764         | Language-Self-help      | 0.613 |
| Gross motor-Self-help                   | 0.670          | Cognition-Language       | 0.852         | Social skills-Self-help | 0.715 |

Model fit: RMSEA=0.069

RMSEA, root mean square error of approximation.

| 66-71 Months                            |                |                          |               |                         |       |
|-----------------------------------------|----------------|--------------------------|---------------|-------------------------|-------|
| Factor                                  | Factor loading |                          | Factor        | Factor loading          |       |
| Gross motor                             | 0.530          |                          | Language      | 0.642                   |       |
|                                         | 0.665          |                          |               | 0.630                   |       |
|                                         | 0.626          |                          |               | 0.663                   |       |
|                                         | 0.581          |                          |               | 0.674                   |       |
|                                         | 0.733          |                          |               | 0.723                   |       |
|                                         | 0.595          |                          |               | 0.717                   |       |
|                                         | 0.713          |                          |               | 0.655                   |       |
|                                         | 0.597          |                          |               | 0.696                   |       |
| Fine motor                              | 0.627          |                          | Social skills | 0.667                   |       |
|                                         | 0.745          |                          |               | 0.765                   |       |
|                                         | 0.725          |                          |               | 0.796                   |       |
|                                         | 0.855          |                          |               | 0.874                   |       |
|                                         | 0.619          |                          |               | 0.661                   |       |
|                                         | 0.773          |                          |               | 0.517                   |       |
|                                         | 0.863          |                          |               | 0.558                   |       |
|                                         | 0.386          |                          |               | 0.565                   |       |
| Cognition                               | 0.540          |                          | Self-help     | 0.642                   |       |
|                                         | 0.815          |                          |               | 0.721                   |       |
|                                         | 0.636          |                          |               | 0.571                   |       |
|                                         | 0.734          |                          |               | 0.642                   |       |
|                                         | 0.803          |                          |               | 0.645                   |       |
|                                         | 0.757          |                          |               | 0.617                   |       |
|                                         | 0.612          |                          |               | 0.599                   |       |
|                                         | 0.730          |                          |               | 0.557                   |       |
| Correlation coefficient between factors |                |                          |               |                         |       |
| Gross motor-Fine motor                  | 0.570          | Fine motor-Cognition     | 0.630         | Cognition-Social skills | 0.629 |
| Gross motor-Cognition                   | 0.399          | Fine motor-Language      | 0.744         | Cognition-Self-help     | 0.455 |
| Gross motor-Language                    | 0.550          | Fine motor-Social skills | 0.577         | Language-Social skills  | 0.824 |
| Gross motor-Social skills               | 0.557          | Fine motor-Self-help     | 0.575         | Language-Self-help      | 0.487 |
| Gross motor-Self-help                   | 0.609          | Cognition-Language       | 0.797         | Social skills-Self-help | 0.719 |

Model fit: RMSEA=0.064

RMSEA, root mean square error of approximation.
