# Supplementary material for: Development of the Korean Developmental Screening Test for Infants and Children (K-DST)
Source: PubMed Central journal article supplement — Clin Exp Pediatr. 2020 May 14;63(11):438–46. doi: 10.3345/cep.2020.00640 (PMC7642140; doi:10.3345/cep.2020.00640), 2020-05-14
Supplement: cep-2020-00640-suppl6.pdf [file cep-2020-00640-suppl6.pdf]

**Supplementary Table 6. Distribution by age group of restandardization**

| Age group (mo) | 2015      | 2016      | Total     |
|----------------|-----------|-----------|-----------|
| 4-5            | 479       | 144       | 623       |
| 6-7            | 90        | 48        | 138       |
| 8-9            | 22,978    | 20,028    | 43,006    |
| 10-11          | 84,814    | 86,025    | 170,839   |
| 12-13          | 107,017   | 124,531   | 231,548   |
| 14-15          | 569       | 1         | 570       |
| 16-17          | 232       | 106       | 338       |
| 18-19          | 81,747    | 77,796    | 159,543   |
| 20-21          | 62,424    | 62,297    | 124,721   |
| 22-23          | 80,610    | 90,756    | 171,366   |
| 24-26          | 58,262    | 69,599    | 127,861   |
| 27-29          | 3         | 2         | 5         |
| 30-32          | 125,056   | 104,378   | 229,434   |
| 33-35          | 116,228   | 110,209   | 226,437   |
| 36-41          | 64,350    | 68,219    | 132,569   |
| 42-47          | 220,461   | 226,762   | 447,223   |
| 48-53          | 55,620    | 64,585    | 120,205   |
| 54-59          | 184,837   | 189,971   | 374,808   |
| 60-65          | 49,368    | 57,052    | 106,420   |
| 66-71          | 184,373   | 213,139   | 397,512   |
| Total          | 1,499,518 | 1,565,648 | 3,065,166 |
